# Supplementary material for: Practices participating in a dental PBRN have substantial and advantageous diversity even though as a group they have much in common with dentists at large
Source: Springer Nature journal article supplement (doi:10.1186/1472-6831-9-26), 2009-10-15
Supplement: Additional file 1 [file 1472-6831-9-26-s1.doc]

**Table S1. Practitioner and Practice Characteristics, in Percent, By Region, for the DPBRN Practitioners Who Completed the Caries Questionnaire**

| **Characteristic** | **AL/MS**  **n=306** | **FL/GA**  **n=106** | **MN**  **n=32** | **PDA**  **n=51** | **SK**  **n=51** | **Total**  **n=546** | **P-Value** |  | | | | | | |
| --- | --- | --- | --- | --- | --- | --- | --- | --- | --- | --- | --- | --- | --- | --- |
| **Practice Setting** | | | | | | | | |  |  |  |  |  |  |
| Number of different sites at which you provide patient care at least once a week  1  2  3  >3 | 93  6  1  0 | 90  9  1  0 | 87  10  0  3 | 98  2  0  0 | 83  15  2  0 | 90  7  2  1 | **0.011** |  | | | | | | |
| Whether or not the practitioner practices full-time  Yes  No | 86  14 | 90  10 | 81  19 | 84  16 | 70  30 | 85  15 | **0.017** |  | | | | | | |
| Number of full-time dental hygienists in your practice  0  1  2  3  >3 | 3  36  40  12  9 | 15  63  15  2  5 | 4  7  29  21  39 | 0  2  2  96  0 | 7  72  21  0  0 | 5  37  30  19  9 | **<0.0001** |  | | | | | | |
| Number of full-time dental assistants in your practice  0  1  2  3  >3 | 3  43  37  10  7 | 4  24  52  9  11 | 0  6  23  13  58 | 0  4  96  0  0 | 6  26  35  9  24 | 3  32  44  9  12 | **<0.0001** |  | | | | | | |
| Number of dental chairs you use regularly in your part of the practice, mean (SD) | 5(2) | 10(5) | 6(5) | 4(3) | 3(2) | 5(3) | **<0.0001** |  | | | | | | |
| Number of patient visits you personally have during a typical week*  0-20  21-40  41-60  61-80  81-100  >100 | 7  37  33  14  6  3 | 6  47  29  10  3  5 | 3  38  53  6  0  0 | 0  53  45  2  0  0 | 5  19  51  21  4  0 | 6  39  36  12  4  3 | **0.002** |  | | | | | | |
| Typical number of days a patient has to wait for a new patient examination, mean (SD) | 9 (14) | 11(15) | 18(11) | 29(18) | 19(28) | 13(17) | **<0.0001** |  | | | | | | |
| Typical number of days a patient has to wait for a treatment procedure appointment, mean (SD) | 9(11) | 9(11) | 21(11) | 27(29) | 11(7) | 12(15) | **<0.0001** |  | | | | | | |
| Practice busyness  Too busy to treat everyone  Provided care to all, but overburdened  Provided care to all, not overburdened  Not busy enough | 10  18  56  16 | 3  16  56  25 | 20  27  50  3 | 8  16  66  10 | 22  33  41  4 | 10  19  55  16 | **<0.0001** |  | | | | | | |
| **Patient population** | | | | | | | | |  |  |  |  |  |  |
| Age distribution, in percent  1-18 year olds  0  1-20  21-40  41-60  61-80  81-100  19-44 year olds  0  1-20  21-40  41-60  61-80  81-100  45-64 year olds  0  1-20  21-40  41-60  61-80  81-100  65 or older  0  1-20  21-40  41-60  61-80  81-100 | 1  69  21  3  1  5  0  22  62  15  1  0  0  17  70  11  2  0  1  75  22  2  0  0 | 1  76  13  3  0  7  5  38  49  5  3  0  7  14  61  15  3  0  8  50  26  12  3  1 | 3  69  25  0  0  3  0  41  53  6  0  0  3  12  66  13  6  0  3  60  25  6  3  3 | 0  92  4  0  0  4  0  15  64  21  0  0  0  8  81  9  0  2  0  85  15  0  0  0 | 0  63  20  2  2  13  7  27  53  13  0  0  7  18  60  11  4  0  5  60  35  0  0  0 | 1  72  17  3  1  6  1  26  58  13  1  1  2  15  68  12  3  0  3  68  24  4  1  0 | **0.044**  **0.002**  **0.002**  **<0.0001** |  | | | | | | |
| Racial distribution, in percent  White  0  1-20  21-40  41-60  61-80  81-100  Black or African American  0  1-20  21-40  41-60  61-80  81-100 | 0  3  6  23  41  27  0  52  32  12  2  2 | 2  5  10  20  32  31  3  75  15  4  3  0 | 0  4  10  20  13  53  0  87  13  0  0  0 | 1  1  4  33  48  13  2  94  4  0  0  0 | 5  0  0  0  7  88  40  60  0  0  0  0 | 1  3  6  21  35  34  4  62  23  8  2  1 | **<0.0001**  **<0.0001** |  | | | | | | |
| Percentage of revenues or charges that are derived from different payment sources  Insurance  0  1-20  21-40  41-60  61-80  81-100  Self-Pay  0  1-20  21-40  41-60  61-80  81-100  Unpaid  0  1-20  21-40  41-60  61-80  81-100  Other  0  1-20  21-40  41-60  61-80  81-100 | 0  4  14  39  34  9    0  28  40  23  6  3  2  97  1  0  0  0  7  86  4  2  0  1 | 4  12  27  31  23  3    1  16  32  26  15  10  28  69  2  0  0  1  75  22  1  0  1  1 | 0  7  3  0  40  50    0  97  0  3  0  0  34  66  0  0  0  0  85  8  0  0  3  4 | 0  0  0  0  2  98  20  78  2  0  0  0  61  39  0  0  0  0  80  20  0  0  0  0 | 15  67  10  5  0  3    10  5  0  8  33  44  25  75  0  0  0  0  44  44  3  0  0  9 | 2  10  15  29  26  18    3  32  29  19  9  8  16  83  1  0  0  0  47  47  3  0  1  2 | **<0.0001**  **<0.0001**  **<0.0001**  **<0.0001** |  | | | | | | |
| **Dental procedure characteristics** | | | | | | | | |  |  |  |  |  |  |
| Percentage of your time each day spent doing specific procedures  Non-implant restorative (amalgams, composites, crowns, bridges, posts, foundations, etc.)  0  1-20  21-40  41-60  61-80  81-100  Implants (includes both prosthetic and surgical procedures)  0  1-20  21-40  41-60  61-80  81-100  Dental extractions (surgical and non-surgical)  0  1-20  21-40  41-60  61-80  81-100  Periodontal therapy (surgical and non-surgical)  0  1-20  21-40  41-60  61-80  81-100  Endodontic therapy (root canals and endodontic surgery)  0  1-20  21-40  41-60  61-80  81-100  Other (sealants, periodic and hygiene examinations, preventive dentistry, diagnostic, or other-specify)  0  1-20  21-40  41-60  61-80  81-100 | 0  5  16  34  34  11  1  97  2  0  0  0  0  94  6  0  0  0  0  100  0  0  0  0      0  91  8  1  0  0    1  85  12  1  1  0 | 0  4  19  37  33  7  15  83  2  0  0  0  6  80  11  2  1  0  18  81  0  0  0  1      12  76  11  1  0  0    3  77  14  4  1  1 | 0  0  3  38  50  9  7  93  0  0  0  0  3  97  0  0  0  0  10  90  0  0  0  0      0  97  3  0  0  0    0  85  15  0  0  0 | 0  0  12  55  31  2  77  23  0  0  0  0  0  90  8  2  0  0  32  66  0  2  0  0      4  94  2  0  0  0    0  94  6  0  0  0 | 0  12  32  29  17  10  12  81  5  2  0  0  7  93  0  0  0  0  7  72  19  2  0  0      5  88  7  0  0  0    10  64  15  8  3  0 | 0  5  17  37  32  9  13  85  2  0  0  0  2  90  6  2  0  0  9  88  2  1  0  0      3  89  8  0  0  0    2  82  13  2  1  0 | **0.047**  **<0.0001**  **<0.0001**  **<0.0001**  **<0.0001**  **0.012** |  | | | | | | |
| Percentage of procedures that are done mainly for esthetic reasons  0  1-20  21-40  41-60  61-80  81-100 | 1  71  18  7  2  1 | 2  62  20  12  2  2 | 0  93  7  0  0  0 | 6  94  0  0  0  0 | 5  84  11  0  0  0 | 1  73  18  6  1  1 | **<0.0001** |  | | | | | | |
| Percentage of certain procedures that you refer  Implant surgery  0  1-20  21-40  41-60  61-80  81-100  Implant restorations  0  1-20  21-40  41-60  61-80  81-100  Anterior root canals  0  1-20  21-40  41-60  61-80  81-100  Molar root canals  0  1-20  21-40  41-60  61-80  81-100  Non-surgical extractions  0  1-20  21-40  41-60  61-80  81-100 | 0  4  1  2  1  92  1  77  1  0  1  20  0  70  2  2  2  24  0  34  4  7  4  51  1  76  2  7  4  10 | 3  13  2  2  1  79  14  74  0  0  0  12  7  66  3  2  2  20  3  27  9  5  3  53  7  57  7  13  4  12 | 3  0  0  0  0  97  3  21  0  0  0  76  0  97  0  0  0  3  0  45  14  14  7  20  4  80  3  3  3  7 | 0  2  0  0  0  98  0  0  0  0  0  100  28  64  0  2  2  4  0  8  12  28  6  44  48  46  0  6  0  0 | 4  21  2  2  2  69  7  50  4  4  0  35  5  95  0  0  0  0  4  91  0  2  2  0  7  93  0  0  0  0 | 1  7  1  2  1  88  4  63  1  0  1  31  4  73  2  1  2  18  1  36  6  8  4  45  7  72  3  7  3  8 | **<0.0001**  **<0.0001**  **<0.0001**  **<0.0001**  **<0.0001** |  | | | | | | |
| Percentage of patients who get certain services at some time while they are patients in your practice  Diet counseling  0  1-20  21-40  41-60  61-80  81-100  Blood pressure screening  0  1-20  21-40  41-60  61-80  81-100  Oral cancer screening  0  1-20  21-40  41-60  61-80  81-100  Oral hygiene instruction  0  1-20  21-40  41-60  61-80  81-100  Patient education from pamphlets  0  1-20  21-40  41-60  61-80  81-100  Intraoral photographs  0  1-20  21-40  41-60  61-80  81-100  Intraoral video images  0  1-20  21-40  41-60  61-80  81-100  At-home tooth whitening  0  1-20  21-40  41-60  61-80  81-100 | 1  56  9  13  6  15    0  62  8  10  6  14  0  2  1  3  7  87  0  1  1  5  9  84  0  47  16  15  8  14    0  84  6  4  3  3  1  79  5  7  2  6  0  75  20  3  1  1 | 5  57  12  5  7  14  6  52  7  8  7  20  2  4  0  1  1  92  2  2  2  4  8  82  3  32  20  13  8  24    6  62  10  8  2  12  7  73  5  6  3  6  3  57  25  10  2  3 | 0  26  15  11  26  22  0  49  7  11  0  33  0  0  0  4  4  92  0  0  0  4  0  96  0  19  19  22  14  26  0  93  4  0  0  3  4  93  0  0  0  3  0  82  14  4  0  0 | 4  24  14  8  22  30  2  0  0  0  6  92  0  0  0  0  0  100  0  0  0  0  0  100  0  36  14  28  6  16  70  30  0  0  0  0  76  24  0  0  0  0  4  90  4  2  0  0 | 0  53  19  11  4  13  4  96  0  0  0  0  2  19  0  2  4  73  0  4  9  9  28  50  0  56  24  9  0  11  2  84  6  6  2  0  2  91  5  0  2  0  2  90  4  4  0  0 | 2  51  11  10  10  16  2  56  6  7  6  23  1  3  1  2  5  88  0  1  2  4  9  84  1  42  18  16  7  16  8  75  6  4  3  4  9  74  4  5  3  5  1  74  17  4  2  2 | **<0.0001**  **<0.0001**  **0.008**  **<0.0001**  **0.004**  **<0.0001**  **<0.0001**  **<0.0001** |  | | | | | | |
| Number of root canal procedures that you do or refer each month  0  1-5  6-10  11-15  16-20  >20 | 2  16  28  21  17  16 | 0  24  34  16  18  8 | 4  22  44  19  4  7 | 0  26  30  22  14  8 | 4  23  32  15  15  11 | 1  20  31  19  16  13 | **<0.0001** |  | | | | | | |
| Number of dental extractions that you do or refer each month  0  1-5  6-10  11-15  16-20  >20 | 0  25  30  13  17  15 | 1  38  30  9  10  12 | 0  33  33  19  15  0 | 0  38  8  10  4  10 | 4  66  23  4  2  0 | 1  33  30  11  13  12 | **<0.0001** |  | | | | | | |
| **Dentist individual characteristics** | | | | | | | | |  |  |  |  |  |  |
| Gender  Male  Female | 85  15 | 87  13 | 69  31 | 82  18 | 55  45 | 82  18 | **0.001** |  | | | | | | |
| Race  White  Black or African American  American Indian  Asian | 94  4  1  1 | 94  4  0  2 | 90  7  0  3 | 80  4  2  14 | 100  0  0  0 | 93  4  0  3 | **0.005** |  | | | | | | |
| Year of graduation from dental school  Before 1974  1974-1983  1984-1993  1994 or later | 19  39  24  18 | 19  43  22  16 | 0  37  32  31 | 4  26  31  39 | 13  38  22  27 | 16  38  24  22 | **0.004** |  | | | | | | |

- All statistical tests were performed using the chi-square test or two-sample t-test. p<0.05 is significant
